# Supplementary material for: Ionic strength assay via polyacrylate–ferriferrous oxide magnetic photonic crystals
Source: Royal Society of Chemistry journal article supplement (doi:10.1039/c5an00218d), 2015-01-01
Supplement: c5an00218d1.pdf [file c5an00218d1.pdf]

## Electronic Supplementary Information

# Ion strength assay via polyacrylate-ferriferrous oxide magnetic photonic crystals

Yan-Ran Li, Ye Sun, and He-Fang Wang\*

Research Center for Analytical Sciences, College of Chemistry, Nankai University, Tianjin Key laboratory of Biosensing and Molecular Recognition (Nankai University), State Key Laboratory of Medicinal Chemical Biology (Nankai University), Collaborative Innovation Center of Chemical Science and Engineering (Tianjin), Tianjin 300071, China

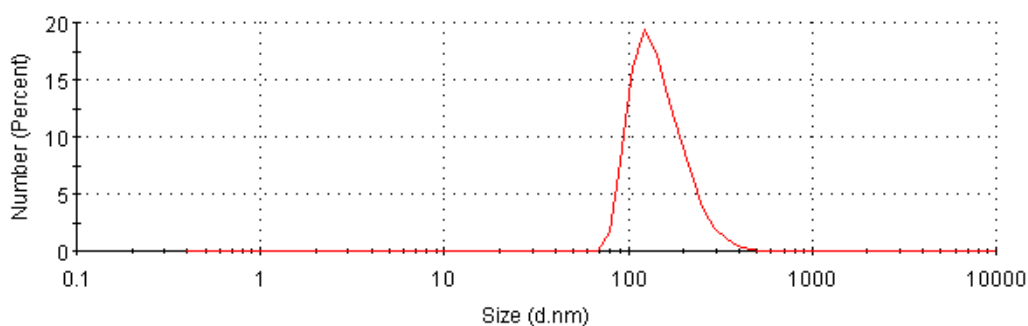

Fig. S1 Size distribution of PA-Fe<sub>3</sub>O<sub>4</sub> nanoparticles by DLS (PDI = 0.167).

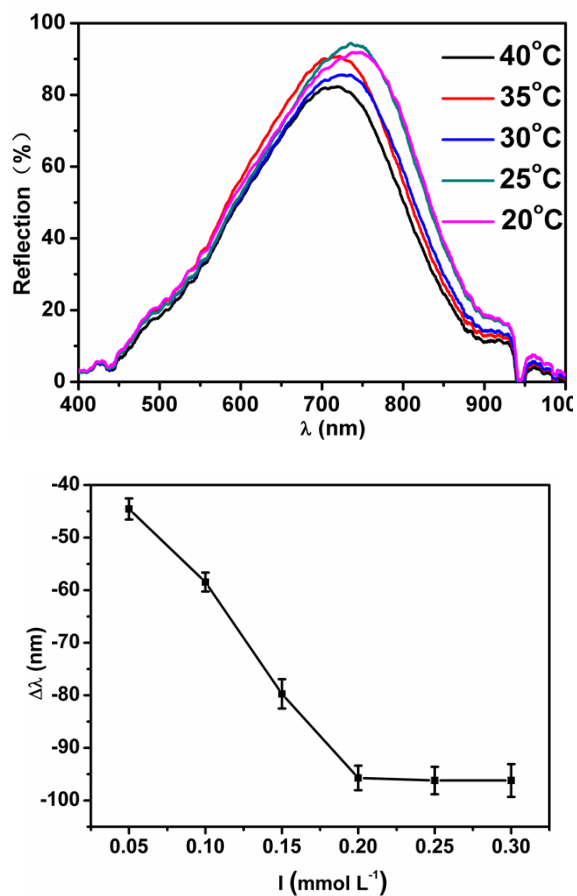

Fig. S2 The temperature effect on the reflection wavelength of MPCs (top) and the wavelength blueshifts of MPCs against  $I_{\text{NaCl}}$  at 30 °C (below).

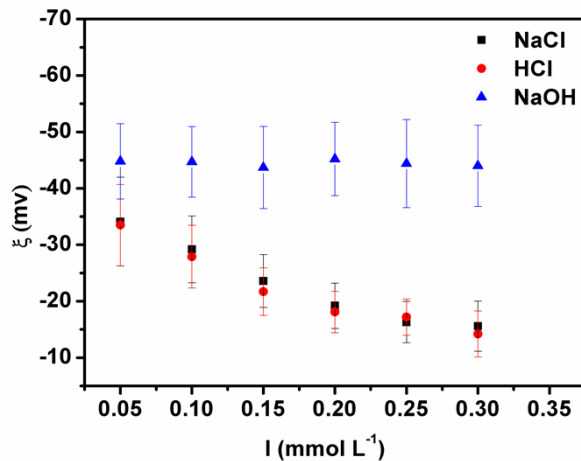

Fig. S3 Zeta potential of PA-Fe<sub>3</sub>O<sub>4</sub> nanoparticles in the presence of NaCl, HCl and NaOH.

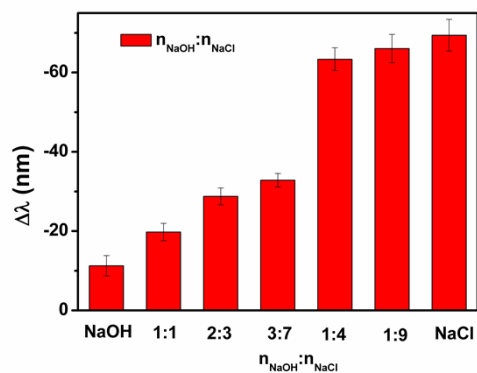

Fig. S4 The wavelength blueshifts of the MPCs in the solutions of NaOH and NaCl at different molar ratios (the experiment was done as follows: the IS of the NaOH/NaCl solution was kept at 10 mM in the molar ratio ( $n_{\text{NaOH}} : n_{\text{NaCl}}$ ) of 1:1, 2:3, 3:7, 1:4 and 1:9, and 20  $\mu\text{L}$  of the mixed solution was added into 1 mL of 4 mg mL<sup>-1</sup> PA-Fe<sub>3</sub>O<sub>4</sub>-MPCs solution and then the wavelength was measured).

Table S1 Comparison of this method to other methods reported in literatures

| Materials                               | Principles                                                                                                                                                                     | $\Delta\lambda$ /IS range             | Measured ions                                                                           | Respond time    | References  |
|-----------------------------------------|--------------------------------------------------------------------------------------------------------------------------------------------------------------------------------|---------------------------------------|-----------------------------------------------------------------------------------------|-----------------|-------------|
| PA-Fe <sub>3</sub> O <sub>4</sub> -MPCs | Electrolytes-induced zeta potential change causing wavelength shifts                                                                                                           | 90 nm/0.05- 0.30mM                    | NaCl, KCl, HCl, CaCl <sub>2</sub> , MgCl <sub>2</sub> , Na <sub>2</sub> SO <sub>4</sub> | 8 s             | this method |
| PM-PCF                                  | Swelling induced radial pressure change causing wavelength shifts                                                                                                              | 3.74 nm/ 0-5 M                        | NaCl                                                                                    | 1 min           | 1           |
| PCCA                                    | pH and ionic strength-induced swelling of the polymers causing the change of Bragg diffraction wavelength                                                                      | 274 nm/ pH 2-11; 175 nm / 0-1 mM NaCl | pH, NaCl                                                                                | 10 min          | 2           |
| PMCC                                    | Salt-induced deswelling of the microgel particles in the film resulting in a smaller lattice constant of the film and an increased refractive index of the microgel particles. | 357 nm/ 10-667mM                      | NaCl                                                                                    | 114.5 s-150.3 s | 3           |
| PS-co- PCCA                             | Ionic strength induced shrinking and swelling of the polymers causing the change of Bragg diffraction wavelength                                                               | 50 nm /0.1-10 m M                     | NaCl, Na <sub>2</sub> SO <sub>4</sub> , Na <sub>3</sub> Cit                             | <1 s            | 4           |
| Silica colloidal crystals               | Swell or deswell in response to pH and ion strength, causing a change of Bragg diffraction                                                                                     | 80 nm/pH3.67-10.87; 40 nm/0-1 M NaCl  | pH, NaCl                                                                                | unknown         | 5           |

$\Delta\lambda$ : the change of spectra wavelength.

PM-PCF: polyimide-coated polarization-maintaining photonic crystal fiber (PM-PCF) Sagnac interferometer

PCCA: polyacrylamide hydrogel combined with polystyrene crystalline colloidal array (CCA).

PMCC: acrylic acid modified poly(N-isopropylacrylamide) combined with 2-hydroxyethyl methacrylate using N-(3-dimethylamino)propyl-N'-ethylcarbodiimide hydrochloride (EDC) forming the polymerized microgel colloidal crystals.

PS-co- PCCA: Poly(styrene-co-sodium styrenesulfonate) nanoparticles combined with polyacrylamide hydrogel based polymerized colloidal crystal array film

1. C. Wu, B. O. Guan, C. Lu and H. Y. Tam, *Opt. Express*, 2011, **19**, 20003-20008.
2. K. Lee and S. A. Asher, *J. Am. Chem. Soc.*, 2000, **122**, 9534-9537.
3. M. Chen, L. Zhou, Y. Guan and Y. Zhang, *Angew. Chem. Int. Ed.*, 2013, **52**, 9961-9965.
4. C. Fenzl, S. Wilhelm, T. Hirsch and O. S. Wolfbeis, *ACS Appl. Mater. Interfaces*, 2013, **5**, 173-178.
5. J. Huang, X. Hu, W. Zhang, Y. Zhang, G. Li, *Colloid Polym. Sci.* 2008, **286**, 113-118.
